# Supplementary material
Source: MDPI journal article supplement (https://www.mdpi.com/2076-3417/12/6/3063)
Supplement: s1 [file s1]

# Life Cycle Assessment of Substitutive Building Materials for Landfill Capping Systems in Vietnam

Naveedh Ahmed S. <sup>1,\*</sup>, Le Hung Anh <sup>2</sup>, Nguyen Trung Thanh <sup>3</sup>, Pham Thi Mai Thao <sup>4</sup> and Petra Schneider <sup>1,\*</sup>

- <sup>1</sup> Department for Water, Environment, Civil Engineering and Safety, University of Applied Sciences Magdeburg-Stendal, D-39114 Magdeburg, Germany  
<sup>2</sup> Institute for Environmental Science, Engineering & Management, Industrial University of Ho-Chi-Minh City, Vietnam; lehunganh@iuh.edu.vn  
<sup>3</sup> An Giang University, An Giang Province, Vietnam; ntthanh@agu.edu.vn  
<sup>4</sup> Ha Noi University of Natural Resources and Environment, Vietnam; ptmthao@hunre.edu.vn  
\* Correspondence: naveedh.sekar@h2.de (N.A.S.); petra.schneider@h2.de (P.S.)

## Functional Unit for different landfill capping layers used in the study

| Landfill Layers Functional Unit |                                  |                              |
|---------------------------------|----------------------------------|------------------------------|
| Landfill Sample Area            | 1 hectare / 10000 m <sup>2</sup> | <i>Volume-based on Depth</i> |
| Depth of Mineral Sealing Layer  | 0.6m                             | 6000 m <sup>3</sup>          |

## Comparing product stages; Method: ReCiPe 2016 Midpoint (H) V1.04 / World (2010) H / Characterization

| Impact category                         | Unit         | Quartz Sand - Concrete | Quartz Sand Rund - Concrete | Basalt Sand - Concrete | Granite Sand - Concrete | Marble Sand - Concrete |
|-----------------------------------------|--------------|------------------------|-----------------------------|------------------------|-------------------------|------------------------|
| Global warming                          | kg CO2 eq    | 4.04E+2                | 3.71E+2                     | 3.69E+2                | 3.46E+2                 | 4.34E+2                |
| Stratospheric ozone depletion           | kg CFC11 eq  | 5.03E-5                | 4.7E-5                      | 5.96E-5                | 5.61E-5                 | 6.33E-5                |
| Ionizing radiation                      | kBq Co-60 eq | 2.7                    | 2.5                         | 2.53                   | 2.37                    | 2.9                    |
| Ozone formation, Human health           | kg NOx eq    | 0.84                   | 0.78                        | 0.78                   | 0.74                    | 0.9                    |
| Fine particulate matter formation       | kg PM2.5 eq  | 0.28                   | 0.26                        | 0.26                   | 0.25                    | 0.3                    |
| Ozone formation, Terrestrial ecosystems | kg NOx eq    | 0.85                   | 0.79                        | 0.79                   | 0.74                    | 0.91                   |

|                                        |             |         |         |         |         |         |
|----------------------------------------|-------------|---------|---------|---------|---------|---------|
| <b>Terrestrial acidification</b>       | kg SO2 eq   | 0.73    | 0.67    | 0.68    | 0.64    | 0.78    |
| <b>Freshwater eutrophication</b>       | kg P eq     | 0.04    | 0.04    | 0.04    | 0.04    | 0.05    |
| <b>Marine eutrophication</b>           | kg N eq     | 3.76E-3 | 3.47E-3 | 3.49E-3 | 3.27E-3 | 4.07E-3 |
| <b>Terrestrial ecotoxicity</b>         | kg 1,4-DCB  | 5.06E+2 | 4.91E+2 | 5.17E+2 | 4.87E+2 | 5.36E+2 |
| <b>Freshwater ecotoxicity</b>          | kg 1,4-DCB  | 5.51    | 5.12    | 5.2     | 4.88    | 5.93    |
| <b>Marine ecotoxicity</b>              | kg 1,4-DCB  | 7.46    | 6.94    | 7.05    | 6.61    | 8.02    |
| <b>Human carcinogenic toxicity</b>     | kg 1,4-DCB  | 4.51    | 4.22    | 4.32    | 4.05    | 4.85    |
| <b>Human non-carcinogenic toxicity</b> | kg 1,4-DCB  | 1.48E+2 | 1.38E+2 | 1.39E+2 | 1.3E+2  | 1.59E+2 |
| <b>Land use</b>                        | m2a crop eq | 45.83   | 42.24   | 80.03   | 75.41   | 79.68   |
| <b>Mineral resource scarcity</b>       | kg Cu eq    | 4.38    | 4.01    | 3.98    | 3.73    | 39.41   |
| <b>Fossil resource scarcity</b>        | kg oil eq   | 40.81   | 38.05   | 38.48   | 36.1    | 43.7    |
| <b>Water consumption</b>               | m3          | 3.12    | 3.2     | 3.64    | 3.45    | 3.22    |

### Comparing product stages; Method: Cumulative Energy Demand V1.11 / Cumulative energy demand / Characterization

| Impact category                 | Unit | Quartz Sand - Concrete | Quartz Sand Rund - Concrete | Basalt Sand - Concrete | Granite Sand - Concrete | Marble Sand - Concrete |
|---------------------------------|------|------------------------|-----------------------------|------------------------|-------------------------|------------------------|
| Non renewable, fossil           | MJ   | 1.88E+3                | 1.75E+3                     | 1.77E+3                | 1.66E+3                 | 2.01E+3                |
| Non-renewable, nuclear          | MJ   | 40.64                  | 37.62                       | 37.94                  | 35.57                   | 43.75                  |
| Non-renewable, biomass          | MJ   | 0.38                   | 0.35                        | 0.35                   | 0.33                    | 0.41                   |
| Renewable, biomass              | MJ   | 36.38                  | 33.49                       | 33.68                  | 31.57                   | 39.33                  |
| Renewable, wind, solar, geother | MJ   | 7.28                   | 6.7                         | 6.69                   | 6.27                    | 7.82                   |
| Renewable, water                | MJ   | 84.04                  | 78.16                       | 79.11                  | 74.21                   | 90.02                  |
